# Supplementary material
Source: PubMed Central journal article supplement (PMC5396528)
Supplement: gf451sup_10-1055-s-0031-1298358.pdf [file gf451sup_10-1055-s-0031-1298358.pdf]

# Stand der Reproduktionsmedizin in Deutschland

## The State of Reproductive Medicine in Germany

Autoren

K. Diedrich, T. Strowitzki, H. Kantenich

Institut

Clinic for Gynaecology and Obstetrics, Lübeck

**Tab. 1** Entwicklungen in der Reproduktionsmedizin.

|      |                                                                                                                                                   |
|------|---------------------------------------------------------------------------------------------------------------------------------------------------|
| 1960 | Radioimmunoassays zur Hormonbestimmung<br>ovarielle Stimulation mit Clomifen und Gonadotropinen                                                   |
| 1970 | Sekretion, Synthese, Mechanismus von GnRH und Gonadotropinen<br>In-vitro-Fertilisation und Embryotransfer                                         |
| 1980 | GnRH-Agonisten und Gonadotropine<br>Kryokonservierung von Embryonen und Eizellen                                                                  |
| 1990 | rekombinante Gonadotropine<br>Präimplantationsdiagnostik<br>intrazytoplasmatische Spermieninjektion (ICSI)<br>GnRH-Antagonisten und Gonadotropine |
| 2000 | In-vitro-Reifung von Eizellen (IVM)<br>Vitrifikation von Eizellen und Embryonen<br>embryonale Stammzellen<br>Single-Embryo-Transfer (SET)         |
